1 **Title:**

2 Adult crowding induces sexual dimorphism in chronic stress-response in *Drosophila*  
3 *melanogaster*

4 **Authors:**

5 Shraddha Lall<sup>1</sup>, Akhila Mudunuri<sup>1</sup>, S. Santhosh<sup>1</sup>, Akshay Malwade<sup>1</sup>, Aarcha Thadi<sup>1</sup>, Gayathri  
6 Kondakath<sup>1</sup> and Sutirth Dey<sup>1,\*</sup>

7 <sup>1</sup>Population Biology Laboratory, Biology Division, Indian Institute of Science Education and  
8 Research (IISER) Pune, Dr. Homi Bhabha Road, Pune, Maharashtra, India, 411008

9 **\*Name and address of the corresponding author:**

10 Sutirth Dey

11 Professor, Biology Division

12 Indian Institute of Science Education and Research, Pune

13 Dr. Homi Bhabha Road, Pune, Maharashtra, India 411 008

14 Tel: +91-20-25908054

15 Email: [s.dey@iiserpune.ac.in](mailto:s.dey@iiserpune.ac.in)

16 **Running Title:** Sex modulates stress-response in flies

17 **Keywords:**

18 Adult crowding, anhedonia, exploration, locomotor activity, mechanical perturbation, mood  
19 disorders

20 **SUMMARY STATEMENT**

21 Female fruit flies, like their human counterparts, are more prone to chronic stress-induced  
22 mood disorders like anhedonia or reduced activity. This sexual dimorphism was more evident  
23 in a biotic stress.

24 **ABSTRACT**

25 Stress-induced mood disorders such as depression and anxiety are sexually dimorphic in  
26 human beings. Studying behavioural stress-responses in non-human animal models can help  
27 better understand the behavioural manifestations of these disorders and the dimorphism in  
28 their prevalence. Here we explore how sexes show differential behavioural responses to  
29 different chronic stressors, both abiotic and biotic, by using outbred populations of  
30 *Drosophila melanogaster*. The behaviours studied – namely, anhedonia, motivation to  
31 explore a novel habitat, locomotor activity and sleep levels – have been well-investigated in  
32 human and rodent-based models of stress disorders. These behaviours were studied in the  
33 context of two different stressors – mechanical perturbation and adult crowding. Responses to  
34 stress were found to be sexually dimorphic, and stressed females showed more behavioural  
35 changes, such as a reduced motivation to explore a novel habitat. Furthermore, adult  
36 crowding caused a greater number of sexually dimorphic behavioural changes than  
37 mechanical perturbation. For instance, while mechanical perturbation caused anhedonia  
38 across sexes, only females were anhedonic after crowding. We thus make a case for  
39 *Drosophila melanogaster* as a model system for studying sexual dimorphism in stress-  
40 induced mood disorders in humans.

41

42

## 43 INTRODUCTION

44 Stress-induced mood disorders (SIMDs) such as depression (Krishnan and Nestler, 2008; Van  
45 Praag, 2004) and anxiety (Shin and Liberzon, 2009) can cause debilitating psychological  
46 symptoms including suicidal tendencies, loss of sleep or appetite and reduced interest in  
47 pleasurable activities (World Health Organisation, 2017; see Cryan and Holmes, 2005; Wong  
48 and Licinio, 2001 for reviews). Moreover, they have been etiologically associated with other  
49 physiological ailments like type-2 diabetes (Knol et al., 2006), cardiac disease and  
50 cerebrovascular disease (reviewed in Evans et al., 2005). In order to better manage and treat  
51 these disorders, identifying therapeutic targets and drugs for SIMDs or enhancing the efficacy  
52 of the current treatments (Wong and Licinio, 2004) has been a key focus for researchers for  
53 over 60 years. Much of the research in this area has used animal models to investigate the  
54 underlying symptoms and the predisposition to these disorders, as well as develop novel  
55 therapeutic strategies. Mammals are often seen as natural models in which to study the stress-  
56 response, with rodent (see Abelaira et al., 2013; Cryan and Holmes, 2005; Willner, 2017;  
57 Willner et al., 1992 for reviews), dog (Seligman and Maier, 1967) and primate (see Mendoza  
58 et al., 2000 for a discussion) models being popular. Recently, it has been shown that  
59 invertebrates, specifically *Drosophila melanogaster*, can also be a useful model-system for  
60 studying SIMDs (reviewed in Iliadi, 2009). Unfortunately, certain well-known features of  
61 human SIMDs remain relatively less explored in the model systems.

62 One of the features of SIMDs in humans is that they can be sexually dimorphic, i.e. males  
63 and females can differ in terms of how they are affected by these disorders. For example, in  
64 humans, the prevalence of depression (Kessler, 2003; Nolen-Hoeksema, 1987) and  
65 generalized anxiety disorder (McLean et al., 2011; Wittchen et al., 1994) is reported to be  
66 twice as much in females than in males. Furthermore, it is known that males and females can  
67 respond differently to drugs used for treating SIMDs (reviewed in Frackiewicz et al., 2000).  
68 Curiously though, in spite of this, how sex affects SIMDs has remained relatively less  
69 investigated in both vertebrate (see Palanza and Parmigiani, 2017 for a discussion) and  
70 invertebrate model systems (however, see Neckameyer and Matsuo, 2008; Neckameyer and  
71 Nieto-Romero, 2015)

72 To complicate matters further, the method of stress-induction in animal models can affect the  
73 ensuing behavioural changes. For instance, while acute oxidative stress for 24 hours caused a  
74 decrease in exploratory locomotion in fruit flies across most ages and sexes, starvation both

75 increased and decreased exploration depending upon the age and sex of the fly (Neckameyer  
76 and Matsuo, 2008). However, when a combination of stressors like starvation, heat stress,  
77 cold stress and sleep deprivation was used over ten days, no change was observed in  
78 exploratory behaviour in male flies (Araujo et al., 2018). The same chronic stress protocol led  
79 to no change in short-term locomotor behaviour over 1-2 minutes (Araujo et al., 2018).  
80 However, when a 3-day long chronic vibrational stress protocol was used, reduced activity  
81 over a 15-minute period was observed in male flies (Ries et al., 2017). Further, when a  
82 paradigm of learned helplessness was used, wherein flies were given electric shocks in a 10-  
83 20-minute period, they showed an increased latency to escape from the shock-box after the  
84 stress (Batsching et al., 2016). However, there were no long-term changes in locomotor  
85 behaviour in an open-field arena, thus making this stressor environment specific (Batsching  
86 et al., 2016).

87 Apart from the abiotic components mentioned above, the social environment of a species can  
88 also act as a potential source of stress (Palanza, 2001). For example, social isolation for 24-  
89 hours in fruit flies has been shown to reduce the number of transitions in a light-dark box,  
90 regardless of the age and sex of the fly, thus suggesting a negative impact of this acute  
91 stressor on exploratory behaviour (Neckameyer and Nieto-Romero, 2015). Adult crowding  
92 for 3 days has been shown to reduce both mortality during crowding and post-stress fecundity  
93 in fruit flies (Joshi et al., 1998). Furthermore, adult crowding in flies is known to lead to a  
94 reduction in lifespan, possibly due a reduction in stored energy reserves (Joshi and Mueller,  
95 1997).

96 In this study, we attempt to understand how sexual dimorphism in stress-response is  
97 modulated by the nature of the stressor in the common fruit fly *Drosophila melanogaster*. For  
98 this purpose, we studied an abiotic stressor (namely, mechanical perturbation) as well as a  
99 biotic one (namely, adult crowding). We employed 3-day long chronic stress protocols, and  
100 provided overnight rest before any behavioural measurements. We measured the stress-  
101 response in terms of three different behaviours – anhedonia, exploratory behaviour, and  
102 locomotor activity/sleep. Anhedonia – a reduction in normally rewarding, pleasurable  
103 activities – is a core symptom of depression in human beings (Krishnan and Nestler, 2008;  
104 Nestler et al., 2002), and has been previously observed in stressed male fruit flies (Araujo et  
105 al., 2018; Ries et al., 2017). Similarly, the tendency to explore a novel arena is influenced by  
106 the motivational state of the fly (Liu et al., 2007), and edge-preference and reduced  
107 exploration of an arena is seen as a marker of shelter-seeking (Liu et al., 2007). Such a

108 reduction in motivation to explore and investigate a novel arena has also been observed in  
109 stressed rodents (Strekalova et al., 2004; Willner, 1997). Finally, altered psychomotor activity  
110 (Nelson and Charney, 1981), insomnia (or a lack of sleep) and hypersomnia (excessive  
111 sleeping) have been diagnostic features for SIMDs in humans (Nutt et al., 2008). To check  
112 whether stress causes any changes in psychomotor activity and rest levels, we recorded the  
113 locomotor behaviour of the flies over a 6-hour period. We measured both the amount of time  
114 the fly spends resting or sleeping, as well as the activity level of the fly during wakefulness.  
115 We found that male and female fruit flies responded differently to the two stressors, with  
116 adult crowding leading to a larger number of sexually dimorphic behavioural changes. Both  
117 males and females, after either stress, showed increased levels of sleep. However, while  
118 mechanical perturbation caused anhedonia and made flies hyperactive across sexes, the  
119 changes in these behaviours was sexually dimorphic after adult crowding. Further, female  
120 flies, across stressors, showed a reduced motivation to explore a novel arena, while male flies  
121 did not. Thus, we conclude that sex plays a crucial role in modulating the behavioural stress-  
122 response in fruit flies. We finally discuss the impact of these results on modelling stress-  
123 responses in light of the existent sexual dimorphism in SIMDs in humans.

124

## 125 **MATERIALS AND METHODS**

### 126 *Experimental Populations:*

127 For the set of experiments on ancestral non-selected flies, a laboratory-bred baseline  
128 population of *Drosophila melanogaster* (DB<sub>4</sub>) was used (breeding population of ~2400, 21-  
129 day discrete generation cycle). The detailed maintenance protocol of this population can be  
130 found elsewhere (Sah et al., 2013). For each assay, age-matched flies were used for all  
131 treatment groups. Adult flies, between 11 and 13 days old, were separated by sex under light  
132 CO<sub>2</sub> anaesthesia. They were subjected to the experimental protocol after allowing them to  
133 recover overnight.

134

### 135 *Stressors:*

#### 136 *Mechanical perturbation*

137 This stress paradigm was modified from the vibrational stress protocol in Ries et al., (2017).  
138 25-50 flies of either sex were kept in vials containing a sponge at the bottom, soaked with

139 water, for the duration of the stress. The treatment vials were placed on a platform shaker,  
140 rotating at 400 RPM, while the control vials were placed on an undisturbed surface. The  
141 mechanical perturbation was provided for 15 minutes, followed by a period of rest for 15  
142 minutes. This was repeated over the entire duration of the stress protocol, which was 8 hours  
143 for males and 10 hours for females. These durations were finalized based on standardizations  
144 for both sexes, to ensure that there was minimal mortality due to the stress ( $< 3\%$ ). They were  
145 then transferred to vials containing food and allowed to recover overnight. The same protocol  
146 was carried out at the same time of the day for 3 days; on the 4<sup>th</sup> day, the flies were subjected  
147 to various assays.

148

#### 149 *Adult crowding*

150 The protocol was modified from Joshi and Mueller, (1997). 150 flies of either sex were  
151 placed in a vial with ~6mL of food. A sponge plug was pushed into the vial such that there  
152 was 0.7cm distance between the food and the plug for males and 1cm for females. This stress  
153 was maintained for 72 hours at a stretch. After this, the flies were transferred to round-bottom  
154 fly bottles with food and the crowding stress was relaxed for 14 hours before the assays were  
155 conducted. Control vials had 50 flies of either sex, maintained under uncrowded conditions  
156 (i.e. ~5.5cm gap between the plug and the food).

157

#### 158 *Assays:*

##### 159 *Rapid iterative negative geotaxis (RING) assay*

160 The RING assay set up was modified from an existing protocol (Gargano et al., 2005). The  
161 RING frame consisted of ~26 adjoining columns, ~1.2 cm wide and ~35 cm in height. The  
162 bottom of the frame was covered by doubled-over tape, to ensure a uniform base while  
163 ensuring that the surface is not sticky. This frame was loaded into a metallic support  
164 structure, consisting of two long rods to hold the frame in place, and a base covered by foam  
165 to absorb the shock, while maintaining it in a vertical position.

166 In each frame, 25 flies of one treatment and one sex were loaded into one column, and  
167 alternate columns were filled. 8 columns were assayed at a time in one round. Each such  
168 round had replicates from all treatment groups from one sex. Once the flies were loaded into  
169 the columns, the top was closed using cotton plugs, and the frame was mounted on the

170 support. The flies were allowed to settle. The assay was performed in a dark room, with  
171 diffused light from the back of the set-up, to facilitate contrast for recording with a video  
172 camera (Sony HDR-PJ410).

173 The frame was mechanically disturbed, and moved sharply to the base, to make all the flies  
174 fall to the bottom. Once the flies were at the bottom, video recording was started, and a timer  
175 was kept for 30 seconds, which constituted one trial. After 30 seconds, the frame was  
176 disturbed similarly, and the process was repeated for 10 consecutive trials.

177 For each round, both the 1<sup>st</sup> and the 10<sup>th</sup> trial were scored. Screenshots were taken from the  
178 video recorded, at a fixed time point in the trials. The time-points were selected such that the  
179 snapshots were taken when the flies were dispersed throughout the set-up, and a majority of  
180 them had not reached the top. For males, this fixed point was 10s, while it was 15s for  
181 females.

182 The length of the column was divided into 31 bins of 1 cm. The number of flies in each bin  
183 were counted. If a fly was halfway between bins, it was counted in the bin in which its  
184 lowermost tip was present. The distance travelled was measured as the distance crossed by  
185 the entire body of the fly, that is, the lower limit of the bin in which it was scored.

186 Two parameters were scored – the average distance travelled by the flies of each treatment,  
187 and the propensity to show negative geotactic mobility. The propensity was measured as the  
188 total number of flies in each treatment that left the base of the set-up and travelled at least 1  
189 cm. Being a fraction, the propensity data was arcsine-square root transformed before analysis  
190 (Zar, 1999).

191

192 *Stop for sweet assay*

193 Mechanical perturbation:

194 The protocol was modified from Ries et al., (2017). After 3 days of stress (or control)  
195 treatment and recovery (as mentioned above), on the 4<sup>th</sup> day, the flies were subjected to the  
196 stress (or control) protocol for 4 hours, but in the absence of water.

197 A cotton strip soaked in 99% glycerol was stuck across the middle of a 35mm petri plate of  
198 thickness 1.5cm. The plate was covered by a lid and sealed. Individual flies were aspirated  
199 into clean 5mm transparent glass tubes right before the assay. They were introduced into the  
200 set-up via a small hole drilled into the side of the lid, with the help of a glass tube and an

201 aspirator. The fly was then shaken down to the bottom of the plate and allowed to wander  
202 around in the setup. For each fly, it was scored whether during a cross-over of the strip, it  
203 overran the glycerol or stopped to eat. Care was taken to only count the stops where the fly  
204 was eating, and not grooming. After each time the fly ran over the glycerol or stopped to eat,  
205 the setup was shaken again to let the fly start from the bottom of the plate. This process was  
206 repeated for 10 cross-overs for each fly.

207 Each set-up was scored at the time of the assay, by observers trained to identify the  
208 behaviours of stopping and feeding versus not-stopping, but blind to the nature of the  
209 treatment. The proportion of stops by each fly was calculated, given by:

210  $(\text{Number of times each fly stopped to eat}) / (\text{Total number of cross-overs monitored})$

211

212 **Adult crowding:**

213 After 72 hours of crowded (or control) conditions and 14 hours of recovery, both the  
214 treatment and control groups were subjected to 4 hours of starvation and desiccation. The  
215 assay was performed similarly as described above.

216

217 *Exploratory behaviour assay*

218 To measure exploratory tendency in flies, a previously reported experimental protocol  
219 (Soibam et al., 2012) was modified, and the activity was recorded using a video camera  
220 (Sony HDR-PJ410, Sony DCR-SR20E) for scoring later. The experimental arena consisted of  
221 a clear polycarbonate petri dish lid, with an inner diameter of 10 cm. The lid was placed over  
222 a blank sheet of paper having two concentric circles. The outer circle was of the same  
223 diameter as the lid, while the inner circle was such that it divided the arena into two zones –  
224 the zone between the outer and inner circle constituted 1/3rd of the total area, and the zone  
225 inside the inner circle constituted 2/3rd of the total area. Immediately before the assay,  
226 individual flies were aspirated into clean 5mm transparent glass tubes. They were introduced  
227 into the set-up with the help of the tube and an aspirator via a small hole drilled into the  
228 center of the lid. They were given 1 minute to acclimatize to their environment, and observed  
229 for the next 10 minutes.



230 As the flies tend to stay towards the outer edge of the arena, each time they entered the inner  
231 zone and came back was counted as one exploratory trip. The parameter scored was the total  
232 number of trips made by each fly within the 10-minute period.

233

#### 234 *Locomotor activity and rest*

235 Locomotor activity of the flies was measured using *Drosophila* Activity Monitor (DAM2)  
236 data collection systems (Trikinetics Inc., USA) using a standard protocol (Chiu et al., 2010).  
237 This system measures the activity of an individual fly in a glass tube as the number of times it  
238 crosses an infrared beam which bisects each channel in the DAM, perpendicular to the axis of  
239 the tube. Activity readings were taken every 5 minutes for a period of 6 hours.

240 After 3 days of stress and overnight recovery, flies were aspirated into transparent glass  
241 DAM tubes (5-mm diameter), devoid of any food, and plugged with cotton on each side.  
242 Aspiration was preferred over CO<sub>2</sub> anaesthetization as the latter could affect their activity  
243 levels if the readings are taken without sufficient time for recovery from anaesthesia. The  
244 DAM tubes were loaded onto the monitors, with 32 flies in each monitor, and placed  
245 undisturbed in an incubator at 25<sup>0</sup>C at constant light.

246 The first 15 minutes of the data recorded was not scored to allow for acclimatization of the  
247 fly to the environment. Two parameters were scored for each fly – activity index and  
248 proportion of rest. Activity Index (AI) was measured as the total activity counts of a fly  
249 divided by the duration that the fly spent awake or not resting (Gilestro, 2012; Kayser et al.,  
250 2014). No activity for a period of 5 minutes was scored as rest (Chiu et al., 2010; Hendricks  
251 et al., 2000); the fraction of the assay duration spent resting was scored as the proportion of  
252 rest.

253

#### 254 *Starvation resistance assay*

255 Following the recovery period after stress (or control) treatment, groups of 10 flies of each  
256 treatment and sex were made under light CO<sub>2</sub> anaesthesia. They were transferred to vials  
257 containing 1.24% agar, which allowed for an environment of starvation but not desiccation.  
258 They were placed in an incubator at 25<sup>0</sup>C at constant light. At intervals of 4 hours following  
259 the set-up, the total number of flies alive in each vial were counted. This was continued till  
260 there were no flies alive in any vial.

261 Two parameters were scored – The Kaplan-Meier (KM) estimate (Kaplan and Meier, 1958)  
262 and the time point at which 50% of the flies in each vial died. The KM estimate for survival  
263  $S(t)$  at time  $t$  was given by:

$$S(t) = \prod_{t_i < t} \left(1 - \frac{d_i}{n_i}\right)$$

264  
265 where  $d_i$  is the number of flies that died at the time point  $t_i$  and  $n_i$  is the total number of flies  
266 which are at risk till just before the point  $t_i$ .

267

268 *Statistical Analysis:*

269 Males and females were analysed separately for all the assays, because the stress treatment  
270 differed with sex.

271 For RING, replicates of treatment and control groups on which the assay was performed  
272 together were analysed together as one round. Two-factor mixed-model ANOVA was  
273 performed with treatment (stress or control) as a fixed factor, and round as a random factor.  
274 For all other assays, Mann-Whitney U (MWU) tests were performed with treatment (stress or  
275 control) as the factor, as the data failed Shapiro-Wilk normality tests. However, there were no  
276 major changes in significance levels of data when MWU test results were compared to  
277 ANOVA results for the same datasets and all interpretations remain essentially unchanged,  
278 which demonstrates the robustness of our results. Therefore, here we report only the results of  
279 the non-parametric MWU tests.

280 For all experiments, Cohen's  $d$  effect sizes were estimated to compare between groups. The  
281 value of effect size was interpreted as large ( $d > 0.8$ ), medium ( $0.8 > d > 0.5$ ) or small ( $d <$   
282  $0.5$ ) following standard recommendations (Cohen, 1988). MWU tests were performed using  
283 Past3 (Hammer et al., 2001) and ANOVAs were performed using STATISTICA ver. 5  
284 (StatSoft Inc). Survivorship curves for starvation resistance were plotted in SigmaPlot 11.0  
285 (Systat Software Inc.) All other graphs were plotted in R version 3.1.3 (R Core Team, 2015).

286

287

288 **RESULTS**

289 For all the experiments, the statistical data has been reported in Table 1.

290

291 *No Change in Innate Response*

292 There were no significant differences between the stressed flies and the controls of either sex  
293 in either propensity of negative geotaxis, or their ability to climb the walls of the RING setup  
294 (Figs S1-S4). This indicates that neither stressor injured or caused physical harm to the flies,  
295 as negative geotaxis, a cue-based response, is unchanged (Gargano et al., 2005).

296

297 *Lesser Interest in Pleasurable Activities*

298 Flies subjected to mechanical perturbation showed significantly reduced tendency to feed on  
299 glycerol as compared to their controls across both males (Fig. 1A) and females (Fig. 1B).

300 This indicates that this stressor induced anhedonia, i.e. a reduction of interest in pleasurable  
301 activities.

302 When subjected to adult crowding, female flies showed anhedonia and fed lesser on glycerol  
303 (Fig. 1D). However, male flies showed an increased tendency to feed on glycerol (Fig. 1C).

304 This suggests that with respect to anhedonic behaviour, crowding induces sexual dimorphism  
305 in flies.

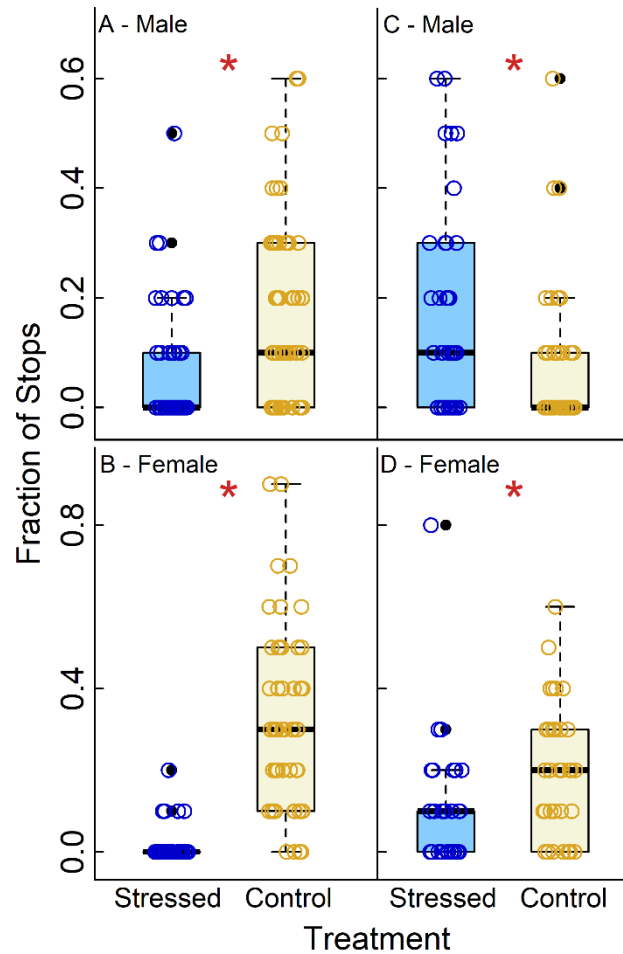

**Fig. 1. Anhedonic response to stress.** Fraction of stops to feed on glycerol in A. males and B. females after mechanical perturbation; C. males and D. females after adult crowding vs their respective controls. \* indicates MWU  $p < 0.05$ . The points represent the data for all replicates of the particular group with small random jitter on the x-axis. The edges of the box denote the 25<sup>th</sup> and 75<sup>th</sup> percentiles, the black solid line represents the median. The whiskers extend to the extreme data point, which is no more than 1.5 times the inter-quartile range from the top or bottom of the box. The points beyond this are indicated as outliers (solid black circles).

306

### 307 *Reduced Exploration of Novel Habitat in Females*

308 Male flies showed no significant change in the tendency to explore their habitat after  
309 mechanical perturbation (Fig. 2A). However, there was a significant reduction in the number  
310 of exploratory trips made by the female flies (Fig. 2B) subjected to this stressor. Also,  
311 although adult crowding did not lead to significant change in exploratory tendency of the  
312 males (Fig. 2C), there was an almost significant ( $p < 0.1$ ) reduction in the number of  
313 exploratory trips in females, with a medium effect size (Fig. 2D, Table 1).

314 Taken together, it can be stated that our stressors do not affect the exploratory tendencies of  
315 male flies, but reduces the same for the female flies. This suggests that stress induces a sexual  
316 dimorphism in exploratory behaviour in fruit flies.

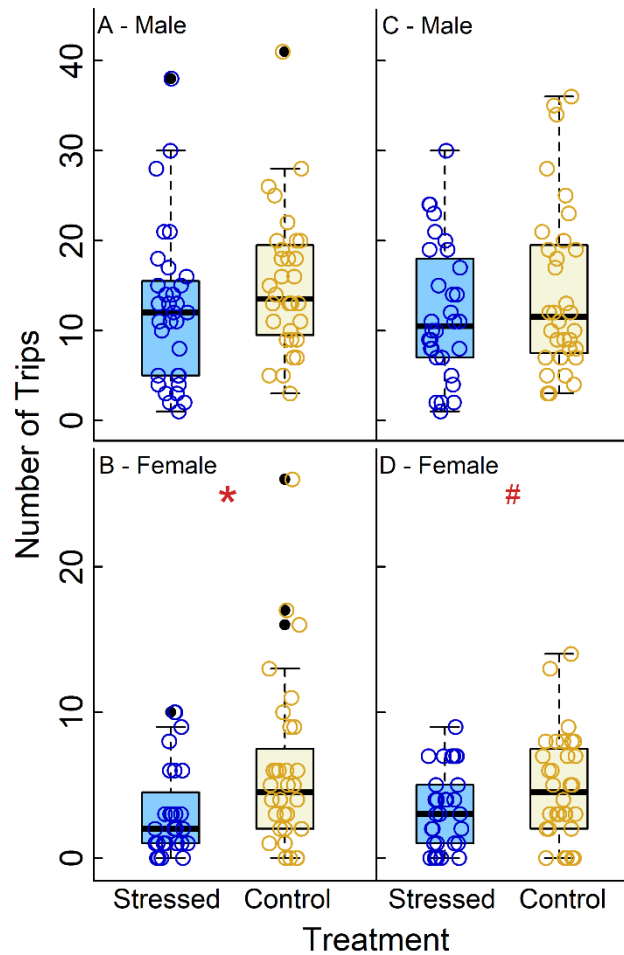

**Fig. 2. Changes in exploratory tendency due to stress:** Number of exploratory trips in A. males and B. females after mechanical perturbation; C. males and D. females after adult crowding vs their respective controls. \* indicates MWU  $p < 0.05$ ; # indicates  $p < 0.1$ .

317

### 318 *Increased Locomotor Activity and Insomnia*

319 The proportion of time spent resting was significantly lowered after mechanical perturbation  
320 in both males (Fig. 3A) and females (Fig. 3B). Similar reduction was also observed across  
321 both sexes after adult crowding (Figs 3C & 3D).

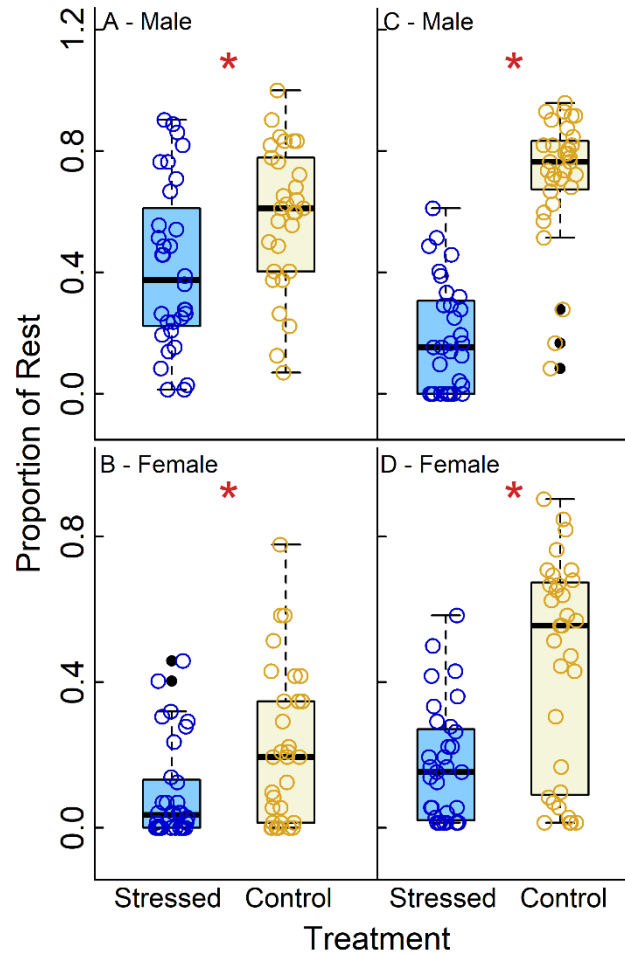

**Fig. 3. Stress-induced changes in sleep or rest levels:** Proportion of time spent resting over 6 hours in A. males and B. females after mechanical perturbation; C. males and D. females after adult crowding vs their respective controls. \* indicates MWU  $p < 0.05$ .

322

323 However, when the Activity Index (AI) was compared for these stressors, crowding again  
324 induced a sexual dimorphism. While both males (Fig. 4A) and females (Fig. 4B) showed  
325 increased AI after mechanical perturbation, after crowding, males showed an almost  
326 significant increase in AI (Fig. 4C), while females showed a reduction in AI (Fig. 4D).

327 Thus, while stress makes flies rest less across sexes, the nature of stressor modulates sexual  
328 dimorphism in AI levels.

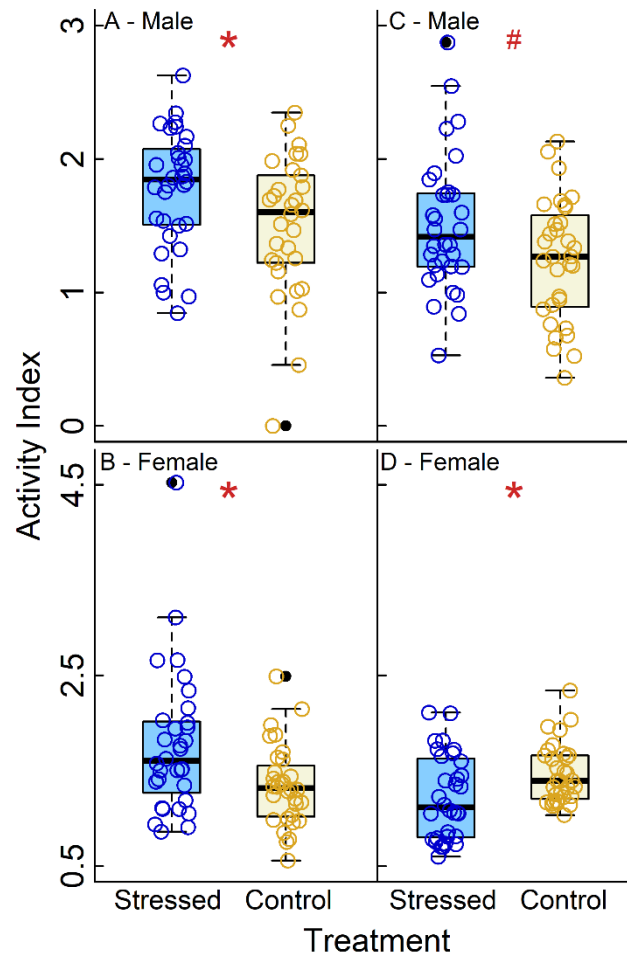

**Fig. 4. Effect of stress on activity during wakefulness:** Activity Index over 6 hours in A. males and B. females after mechanical perturbation; C. males and D. females after adult crowding vs their respective controls. \* indicates MWU  $p < 0.05$ , # indicates  $p < 0.1$

329

330 *No Change in Starvation Resistance*

331 When the starvation resistance of flies which had been subjected to adult crowding was  
332 compared to their controls, there was no difference in the time taken for 50% mortality in the  
333 vial across treatment and control groups for both males and females (Table S1). This is  
334 congruent with the observation that the KM survivorship curves almost superimpose in both  
335 cases (Fig. S5).

336

337 **Table 1. p-values, test statistics, Cohen's *d* and sample sizes for various assays**  
 338 **comparing behavioural responses in stressed versus control flies**

| Assay                               | Sex      | p-value     |             | Test statistic<br>(U) |             | Cohen's <i>d</i> |               | Sample<br>size (n) |             |
|-------------------------------------|----------|-------------|-------------|-----------------------|-------------|------------------|---------------|--------------------|-------------|
|                                     |          | <i>M.P.</i> | <i>A.C.</i> | <i>M.P.</i>           | <i>A.C.</i> | <i>M.P.</i>      | <i>A.C.</i>   | <i>M.P.</i>        | <i>A.C.</i> |
| Fraction of<br>Stops on<br>Glycerol | <i>M</i> | 1.26E-05*   | 3.39E-02*   | 636                   | 441         | 0.876<br>(H)     | 0.518<br>(Me) | 52<br>(S)          | 35<br>(S)   |
|                                     |          |             |             |                       |             |                  |               | 51<br>(C)          | 35<br>(C)   |
|                                     | <i>F</i> | 3.43E-16*   | 5.76E-03*   | 125.5                 | 386         | 1.928<br>(H)     | 0.594<br>(Me) | 51<br>(S)          | 35<br>(S)   |
|                                     |          |             |             |                       |             |                  |               | 54<br>(C)          | 34<br>(C)   |
| Number of<br>Exploratory<br>Trips   | <i>M</i> | 1.02E-01    | 4.08E-01    | 390                   | 450         | 0.350<br>(L)     | 0.287<br>(L)  | 32<br>(S)          | 32<br>(S)   |
|                                     |          |             |             |                       |             |                  |               | 32<br>(C)          | 32<br>(C)   |
|                                     | <i>F</i> | 3.25E-02*   | 7.18E-02#   | 353.5                 | 378.5       | 0.601<br>(Me)    | 0.509<br>(Me) | 32<br>(S)          | 32<br>(S)   |
|                                     |          |             |             |                       |             |                  |               | 32<br>(C)          | 32<br>(C)   |
| Proportion<br>of Rest               | <i>M</i> | 9.92E-03*   | 4.47E-10*   | 296.5                 | 48          | 0.694<br>(Me)    | 2.723<br>(H)  | 32<br>(S)          | 32<br>(S)   |
|                                     |          |             |             |                       |             |                  |               | 30<br>(C)          | 32<br>(C)   |
|                                     | <i>F</i> | 2.22E-02*   | 3.13E-04*   | 343.5                 | 244         | 0.656<br>(Me)    | 1.161<br>(H)  | 32<br>(S)          | 32<br>(S)   |
|                                     |          |             |             |                       |             |                  |               | 32<br>(C)          | 32<br>(C)   |
| Activity<br>Index                   | <i>M</i> | 3.52E-02*   | 6.89E-02#   | 330                   | 376         | 0.573<br>(Me)    | 0.543<br>(Me) | 32<br>(S)          | 32<br>(S)   |
|                                     |          |             |             |                       |             |                  |               | 30<br>(C)          | 32<br>(C)   |
|                                     | <i>F</i> | 8.33E-03*   | 2.21E-02*   | 315                   | 341         | 0.700<br>(Me)    | 0.630<br>(Me) | 32<br>(S)          | 32<br>(S)   |
|                                     |          |             |             |                       |             |                  |               | 32<br>(C)          | 32<br>(C)   |

For p-value: #:  $0.05 < p < 0.1$ , \*:  $p < 0.05$ ; for Cohen's *d*: L:  $d < 0.5$  (low), Me:  $0.5 < d < 0.8$  (medium), H:  $d > 0.8$  (high); M: Male, F: Female; M.P: Mechanical Perturbation, A.C.: Adult Crowding; T: Stressed, C: Control

339

340 Fig. 5 presents a schematic summary of all the results.

341 **DISCUSSION**



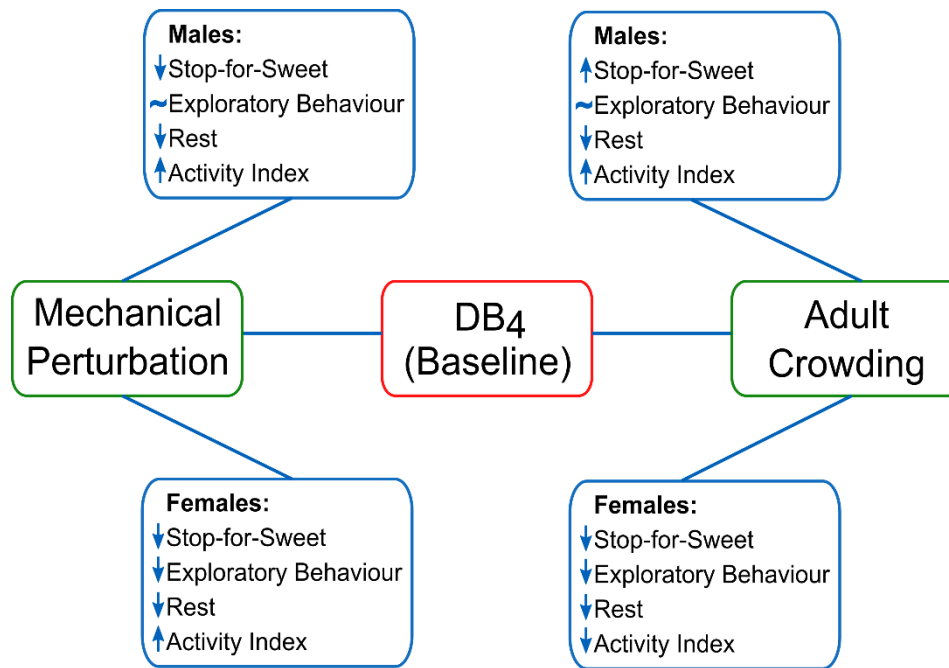

**Fig. 5: Summary of the experimental results.** Behavioural changes due to different stressors in male and female baseline flies. ↑ indicates increase in level of the behaviour measured in stressed flies vs. their controls, ↓ indicates decrease in the level of the behaviour measured in stressed flies vs. their controls, ~ indicates no difference in the level of the behaviour measured between the stressed and control flies.

342

### 343 *Nature of Stressor Modulates Sexual Dimorphism in Anhedonic Behaviour*

344 Hedonic behaviours have been widely used to measure stress-response in rodent models of  
345 Chronic Mild Stress (CMS) (see Willner, 2017; Willner et al., 1992 for discussions). In this  
346 paradigm, the animals are subjected to a series of unpredictable, mild, largely abiotic  
347 stressors over several weeks (Willner, 2017). This typically leads to a reduced preference to  
348 feed on sucrose which is considered anhedonic, i.e. indicating a lack of interest in a  
349 pleasurable activity (Katz, 1982; Willner et al., 1987). Similarly, in male *D. melanogaster*, a  
350 variety of abiotic stresses have been shown to induce anhedonia, which has been measured as  
351 a reduction in feeding on glycerol (Ries et al., 2017) or sucrose (Araujo et al., 2018).

352 In our experiments, the abiotic mechanical perturbation stress paradigm led to a reduction in  
353 glycerol feeding in both male and female flies, thus indicating a lack of motivation to partake  
354 in pleasurable activities (Figs 1A & 1B). However, the biotic stressor – adult crowding –  
355 affected male and female flies differently. This result is consistent with previous studies in

356 rodents, where social instability, with periods of isolation and crowding, resulted in sex-  
357 specific anhedonic responses (Herzog et al., 2009).

358 In our experiments, adult crowding induced anhedonia only in stressed females (Fig. 1D),  
359 while counter-intuitively, stressed males showed an increase in glycerol feeding (Fig. 1C). A  
360 possible reason for this could have been that crowding was leading to a competition for  
361 resources (Joshi and Mueller, 1997). Since male flies have lower body size, they could have  
362 been affected more severely by reduced access to food under crowded condition, thus leading  
363 effectively to starvation. This starvation could then be providing an immediate impetus for  
364 the male flies to feed during the stop-for-sweet assay. On the other hand, female flies are  
365 larger than the males and are known to be more resistant to starvation (Chippindale et al.,  
366 1996; Zwaan et al., 1991). Thus, the females could be responding primarily to the biotic  
367 stressor in a similar way as the abiotic one, thus exhibiting a reduced motivation state, i.e.  
368 anhedonia. Stated differently, it was possible that the males were hungrier (which trumped  
369 anhedonia) while the females were less hungry and therefore exhibited anhedonic symptoms.  
370 To investigate this possibility, we assayed the starvation resistance of the stressed and  
371 unstressed flies. We found that adult crowding does not have an effect on the starvation  
372 resistance of either males or females (Fig. S5), thus overruling this possibility. Thus, the  
373 physiological reason for this dimorphism remains unclear. Summarily, it can be stated that  
374 the nature of the stressor plays a crucial role in anhedonic responses to stress, and sexual  
375 dimorphism in sex response seems to be modulated by the nature of the stressor. To the best  
376 of our knowledge, this is the first demonstration of a sexually dimorphic anhedonic response  
377 to stress in *D. melanogaster*. Anhedonia is a key diagnostic symptom of depression in human  
378 beings, and is known to be sexually dimorphic in humans (Fonseca-Pedrero et al., 2008) and  
379 rodents (Lu et al., 2015).

380

### 381 *Stress Reduces Motivation to Explore Novel Habitat in Females*

382 Our paradigm of non-lethal 3-day stressors revealed a sexual dimorphism in exploratory  
383 behaviour in response to stress. Male flies showed no change in the number of exploratory  
384 trips, while female flies explored significantly lesser. This dimorphism was consistent across  
385 both the biotic and abiotic stressor (Fig. 2). This is in keeping with previous results of sexual  
386 dimorphism in this behaviour in flies after 24-hour long starvation and oxidative stress  
387 (Neckameyer and Matsuo, 2008).

388 The tendency to explore is related to seeking out novel habitats (Cote et al., 2010) and is also  
389 energy intensive. This decrease in exploratory tendencies of female flies after stress could  
390 indicate either a physical inability to explore due to exhaustion or injury from the stressor, or  
391 a lack of motivation to explore new surroundings, or both. However, it is crucial to note that  
392 the cue-based response of negative geotaxis is not affected across sexes by either stressor  
393 (Figs S1-S4), indicating that the changes are not likely due to physical harm, fatigue or injury  
394 to the fly. Thus, we conclude that these flies lack the motivation to explore after being  
395 stressed. Additionally, preference for edges in flies is postulated to be a marker of seeking  
396 shelter (Liu et al., 2007), and the increase in this behaviour could possibly represent increased  
397 fear or anxiety-like behaviour due to stress.

398 Exploratory behaviour is related to locomotor activity levels in rats (Willig et al., 1987). In  
399 fruit flies, exploration is characterized by an initial elevated level of activity (Liu et al.,  
400 2007). Hence, we next investigated the impact of stress on locomotor activity.

401

#### 402 *Stress Causes Insomnia Across Sexes and Changes Locomotor Activity*

403 Long-term changes in rest and activity patterns is indicative of a lasting effect of stress on the  
404 organism. After sufficient time to acclimatize to the environment of recording (see Materials  
405 and Methods), over the next 6-hours, we observed that stress-induced a change in locomotor  
406 activity and rest levels. Both mechanical perturbation and crowding caused the flies to spend  
407 lesser time resting or sleeping across sexes (Fig. 3). Our sleep results in flies are congruent  
408 with previous observations in rats that suggest disruption of sleep patterns after CMS (Cheeta  
409 et al., 1997)

410 Activity Index (AI) is a measure of the flies' activity in the DAM tube during their period of  
411 wakefulness (Gilestro, 2012; Kayser et al., 2014). Mechanical perturbation resulted in  
412 increased locomotor activity during wakefulness in both males and females (Fig. 4A & 4B).  
413 This observation, coupled with lower rest levels, indicates that this stressor induces  
414 hyperactivity in flies. However, adult crowding brings about sexual dimorphism in activity  
415 indices of flies. While male flies subjected to this stressor showed hyperactivity (Fig 4C),  
416 crowded female flies were less active than their controls when awake (Fig. 4D). The  
417 increased activity in male flies over 6 hours is in contrast to previous studies in flies subjected  
418 to vibrational stress, which found a reduction in locomotor activity in stressed males over a  
419 15-minute period (Ries et al., 2017). Thus, the differences in the observations could be due to

420 the vastly different durations over which activity has been measured in the two studies. Our  
421 recordings, over a considerably longer duration, allow for an initial acclimatization period to  
422 the environment. Thus, the immediate exploratory activity in a new environment is excluded  
423 from the data, allowing for basal changes in psychomotor activity and rest levels to be  
424 studied.

425 While exploration and locomotor activity seem to be correlated (Liu et al., 2007; Willig et al.,  
426 1987), our results suggest that stress can impact these two behaviours in very different ways.  
427 Higher activity levels and reduced rest over 6 hours in males after stress does not cause a  
428 concomitant increase in exploratory activity. Rather, a decrease in exploratory behaviour in  
429 females occurs, which can be interpreted as a measure of a reduced motivational state.

430

## 431 **IMPLICATIONS**

432 In this study, we showed that stressors of differing nature (biotic vs abiotic) can cause  
433 varying behavioural responses, and these can be modulated by the sex of the fly. These  
434 results have several interesting implications. Our results are congruent with observations in  
435 human beings that males and females differ in terms of their propensity of various mood  
436 disorders (Kessler, 2003; McLean et al., 2011). For example, in human beings, it is known  
437 that males show larger predisposition to alcoholism and other drug abuse, antisocial  
438 personality disorder and attention deficit disorders while depression, anxiety and eating  
439 disorders predominate in females (see Palanza, 2001 for a discussion). Further, social  
440 contexts for male and female animals are innately different due to differences in their social  
441 roles, differential parental investment etc. Thus, social stresses are more likely to induce  
442 sexually dimorphic responses (see Palanza and Parmigiani, 2017 for a discussion). This  
443 notion is supported by our observation that adult crowding, which is a biotic stressor, induces  
444 sexual dimorphism in a larger number of behaviours. We also found that in general, female  
445 flies were more affected by the stressors than the male flies. This is consistent with human  
446 data on SIMDs that suggest that women are more prone to depression (Kessler, 2003; Nolen-  
447 Hoeksema, 1987) and anxiety (McLean et al., 2011; Wittchen et al., 1994).

448 These results thus strengthen the case for using *D. melanogaster* as a model system to  
449 investigate the phenomenon of sex differences in SIMDs. Previous studies have suggested  
450 that sexual dimorphism in response to acute stress in *D. melanogaster* is modulated by sex-  
451 specific hormones, and the hormonal environment of the brain can determine which neurons

452 are recruited into the stress-response circuitry (Neckameyer and Matsuo, 2008). This could  
453 potentially cause the observed sexually dimorphic responses to chronic stress as well. More  
454 critically, if one can show a reasonable degree of convergence between humans and fruit flies  
455 in terms of the genetic and physiological mechanisms underlying these disorders, then a lot of  
456 research on sex differences in SIMDs can shift to the *Drosophila* system. The advantages of  
457 this model system, in terms of genetic, neurobiological and behavioural tractability, can allow  
458 for a detailed understanding of this dimorphism. Given that *Drosophila* has already proven to  
459 be a good system to model Alzheimer's disease, cardiovascular disease and diabetes, to name  
460 a few (reviewed in Pandey and Nichols, 2011), the possibility of furthering research on  
461 sexual dimorphism in SIMDs using the fruit fly is rather tantalizing.

462

## 463 **LIST OF SYMBOLS AND ABBREVIATIONS**

464 SIMD: Stress-Induced Mood Disorder

465 RING: Rapid Iterative Negative Geotaxis

466 DAM: *Drosophila* Activity Monitor

467 AI: Activity Index

468 KM: Kaplan-Meier

469 MWU: Mann-Whitney U

470 CMS: Chronic Mild Stress

471

472 **ACKNOWLEDGMENTS**

473 We thank Nikita Sabnis, Radha Barve and Sandesh Papade for help in running the  
474 experiments, and Sudipta Tung and Abhishek Mishra for insightful comments. This work was  
475 supported by a research grant (#EMR/2014/000476) from Science and Engineering Research  
476 Board (SERB), Department of Science and Technology, Government of India and internal  
477 funding from IISER-Pune.

478

479 **COMPETING INTERESTS**

480 The authors declare no competing interests.

481

482 **AUTHOR CONTRIBUTIONS**

483 S.L. and S.D. formulated the study, S.L., A.M.<sub>1</sub>, S.S., A.M.<sub>2</sub>, A.T. and G.K. carried out the  
484 experiments, S.L., A.M.<sub>1</sub> and S.S. analysed the data, S.L. and S.D. wrote the manuscript with  
485 inputs from other authors.

486

487 **FUNDING**

488 This work was supported by a research grant (#EMR/2014/000476) from Science and  
489 Engineering Research Board (SERB), Department of Science and Technology, Government  
490 of India and internal funding from IISER-Pune.

491

492 **DATA AVAILABILITY**

493 Data will be deposited in Dryad if the manuscript is accepted for publication.

494 **REFERENCES**

- 495 **Abelaira, H. M., Reúus, G. Z. and Quevedo, J.** (2013). Animal models as tools to study the  
496 pathophysiology of depression. *Rev. Bras. Psiquiatr.* **35**, 112–120.
- 497 **Araujo, S. M., Poetini, M. R., Bortolotto, V. C., de Freitas Couto, S., Pinheiro, F. C.,**  
498 **Meichtry, L. B., de Almeida, F. P., Musachio, E. A. S., de Paula, M. T. and Prigol,**  
499 **M.** (2018). Chronic unpredictable mild stress-induced depressive-like behavior and  
500 dysregulation of brain levels of biogenic amines in *Drosophila melanogaster*. *Behav.*  
501 *Brain Res.* **351**, 104–113.
- 502 **Batsching, S., Wolf, R. and Heisenberg, M.** (2016). Inescapable stress changes walking  
503 behavior in flies - Learned helplessness revisited. *PLoS One* **11**, 1–16.
- 504 **Cheeta, S., Ruigt, G., Van Proosdij, J. and Willner, P.** (1997). Changes in sleep  
505 architecture following chronic mild stress. *Biol. Psychiatry* **41**, 419–427.
- 506 **Chippindale, A. K., Chu, T. J. F. and Rose, M. R.** (1996). Complex trade-offs and the  
507 evolution of starvation resistance in *Drosophila melanogaster*. *Evolution (N. Y.)*. **50**,  
508 753–766.
- 509 **Chiu, J. C., Low, K. H., Pike, D. H., Yildirim, E. and Edery, I.** (2010). Assaying  
510 locomotor activity to study circadian rhythms and sleep parameters in *Drosophila*. *J.*  
511 *Vis. Exp. JoVE* e2157.
- 512 **Cohen, J.** (1988). *Statistical Power Analysis for the Behavioral Sciences*, 2nd edn Lawrence  
513 Erlbaum Associates: Hillsdale. *NJ, USA*.
- 514 **Cote, J., Clobert, J., Brodin, T., Fogarty, S. and Sih, A.** (2010). Personality-dependent  
515 dispersal: characterization, ontogeny and consequences for spatially structured  
516 populations. *Philos. Trans. R. Soc. B Biol. Sci.* **365**, 4065–4076.
- 517 **Cryan, J. F. and Holmes, A.** (2005). Model organisms: The ascent of mouse: Advances in  
518 modelling human depression and anxiety. *Nat. Rev. Drug Discov.* **4**, 775–790.
- 519 **Evans, D. L., Charney, D. S., Lewis, L., Golden, R. N., Gorman, J. M., Krishnan, K. R.**  
520 **R., Nemeroff, C. B., Bremner, J. D., Carney, R. M., Coyne, J. C., et al.** (2005). Mood  
521 disorders in the medically ill: scientific review and recommendations. *Biol. Psychiatry*  
522 **58**, 175–189.



- 523 **Fonseca-Pedrero, E., Lemos-Giraldez, S., Muniz, J., Garcia-Cueto, E. and Campillo-**  
524 **Alvarez, A.** (2008). Schizotypy in adolescence: the role of gender and age. *J. Nerv.*  
525 *Ment. Dis.* **196**, 161–165.
- 526 **Frackiewicz, E. J., Sramek, J. J. and Cutler, N. R.** (2000). Gender differences in  
527 depression and antidepressant pharmacokinetics and adverse events. *Ann.*  
528 *Pharmacother.* **34**, 80–88.
- 529 **Gargano, J. W., Martin, I., Bhandari, P. and Grotewiel, M. S.** (2005). Rapid iterative  
530 negative geotaxis (RING): a new method for assessing age-related locomotor decline in  
531 *Drosophila*. *Exp. Gerontol.* **40**, 386–395.
- 532 **Gilestro, G. F.** (2012). Video tracking and analysis of sleep in *Drosophila melanogaster*.  
533 *Nat. Protoc.* **7**, 995–1007.
- 534 **Hammer, Ø., Harper, D. and Ryan, P.** (2001). Past: Paleontological statistics software  
535 package for education and data analysis. *Paleontol. Electron.* **4**, 1–9.
- 536 **Hendricks, J. C., Finn, S. M., Panckeri, K. A., Chavkin, J., Williams, J. A., Sehgal, A.**  
537 **and Pack, A. I.** (2000). Rest in *Drosophila* is a sleep-like state. *Neuron* **25**, 129–138.
- 538 **Herzog, C. J., Czéh, B., Corbach, S., Wuttke, W., Schulte-Herbrüggen, O., Hellweg, R.,**  
539 **Flügge, G. and Fuchs, E.** (2009). Chronic social instability stress in female rats: a  
540 potential animal model for female depression. *Neuroscience* **159**, 982–992.
- 541 **Iliadi, K. G.** (2009). The genetic basis of emotional behavior: Has the time come for a  
542 *Drosophila* model? *J. Neurogenet.* **23**, 136–146.
- 543 **Joshi, A. and Mueller, L. D.** (1997). Adult crowding effects on longevity in *Drosophila*  
544 *melanogaster*: increase in age-independent mortality. *Curr. Sci.* **72**, 255–260.
- 545 **Joshi, A., Wu, W. P. and Mueller, L. D.** (1998). Density-dependent natural selection in  
546 *Drosophila*: Adaptation to adult crowding. *Evol. Ecol.* **12**, 363–376.
- 547 **Kaplan, E. L. and Meier, P.** (1958). Nonparametric estimation from incomplete  
548 observations. *J. Am. Stat. Assoc.* **53**, 457–481.
- 549 **Katz, R. J.** (1982). Animal model of depression: Pharmacological sensitivity of a hedonic  
550 deficit. *Pharmacol. Biochem. Behav.* **16**, 965–968.
- 551 **Kayser, M. S., Yue, Z. and Sehgal, A.** (2014). A critical period of sleep for development of



- 552 courtship circuitry and behavior in *Drosophila*. *Science* **344**, 269–274.
- 553 **Kessler, R. C.** (2003). Epidemiology of women and depression. *J. Affect. Disord.* **74**, 5–13.
- 554 **Knol, M. J., Twisk, J. W. R., Beekman, A. T. F., Heine, R. J., Snoek, F. J. and Pouwer,**  
555 **F.** (2006). Depression as a risk factor for the onset of type 2 diabetes mellitus. A meta-  
556 analysis. *Diabetologia* **49**, 837–845.
- 557 **Krishnan, V. and Nestler, E. J.** (2008). The molecular neurobiology of depression. *Nature*  
558 **455**, 894–902.
- 559 **Liu, L., Davis, R. L. and Roman, G.** (2007). Exploratory activity in *Drosophila* requires the  
560 kurtz nonvisual arrestin. *Genetics* **175**, 1197–1212.
- 561 **Lu, J., Wu, X. Y., Zhu, Q. Bin, Li, J., Shi, L. G., Wu, J. L., Zhang, Q. J., Huang, M. L.**  
562 **and Bao, A. M.** (2015). Sex differences in the stress response in SD rats. *Behav. Brain*  
563 *Res.* **284**, 231–237.
- 564 **McLean, C. P., Asnaani, A., Litz, B. T. and Hofmann, S. G.** (2011). Gender differences in  
565 anxiety disorders: prevalence, course of illness, comorbidity and burden of illness. *J.*  
566 *Psychiatr. Res.* **45**, 1027–1035.
- 567 **Mendoza, S. P., Capitanio, J. P. and Mason, W. A.** (2000). Chronic Social Stress: Studies  
568 in Non-human Primates. In *The Biology of Animal Stress: Basic Principles and*  
569 *Implications for Animal Welfare* (ed. Moberg, G. P. and Mendoza, S. P.), pp. 227–248.  
570 Wallingford, UK: CABI Pub.
- 571 **Neckameyer, W. S. and Matsuo, H.** (2008). Distinct neural circuits reflect sex, sexual  
572 maturity, and reproductive status in response to stress in *Drosophila melanogaster*.  
573 *Neuroscience* **156**, 841–856.
- 574 **Neckameyer, W. S. and Nieto-Romero, A. R.** (2015). Response to stress in *Drosophila* is  
575 mediated by gender, age and stress paradigm. *Stress* **18**, 254–266.
- 576 **Nelson, J. C. and Charney, D. S.** (1981). The symptoms of major depressive illness. *Am. J.*  
577 *Psychiatry* **138**, 1–13.
- 578 **Nestler, E. J., Barrot, M., DiLeone, R. J., Eisch, A. J., Gold, S. J. and Monteggia, L. M.**  
579 (2002). Neurobiology of Depression. *Neuron* **34**, 13–25.
- 580 **Nolen-Hoeksema, S.** (1987). Sex differences in unipolar depression: evidence and theory.

- 581 *Psychol. Bull.* **101**, 259–282.
- 582 **Nutt, D., Wilson, S. and Paterson, L.** (2008). Sleep disorders as core symptoms of  
583 depression. *Dialogues Clin. Neurosci.* **10**, 329–336.
- 584 **Palanza, P.** (2001). Animal models of anxiety and depression: How are females different?  
585 *Neurosci. Biobehav. Rev.* **25**, 219–233.
- 586 **Palanza, P. and Parmigiani, S.** (2017). How does sex matter? Behavior, stress and animal  
587 models of neurobehavioral disorders. *Neurosci. Biobehav. Rev.* **76**, 134–143.
- 588 **Pandey, U. B. and Nichols, C. D.** (2011). Human disease models in *Drosophila*  
589 *melanogaster* and the role of the fly in therapeutic drug discovery. **63**, 411–436.
- 590 **R Core Team** (2015). R: A Language and Environment for Statistical Computing. Vienna,  
591 Austria: R Foundation for Statistical Computing.
- 592 **Ries, A. S., Hermanns, T., Poeck, B. and Strauss, R.** (2017). Serotonin modulates a  
593 depression-like state in *Drosophila* responsive to lithium treatment. *Nat. Commun.* **8**, 1–  
594 11.
- 595 **Sah, P., Salve, J. P. and Dey, S.** (2013). Stabilizing biological populations and  
596 metapopulations through adaptive limiter control. *J. Theor. Biol.* **320**, 113–123.
- 597 **Seligman, M. E. and Maier, S. F.** (1967). Failure to escape traumatic shock. *J. Exp.*  
598 *Psychol.* **74**, 1–9.
- 599 **Shin, L. M. and Liberzon, I.** (2009). The Neurocircuitry of Fear, Stress, and Anxiety  
600 Disorders. *Neuropsychopharmacology* **35**, 169–191.
- 601 **Soibam, B., Mann, M., Liu, L., Tran, J., Lobaina, M., Kang, Y. Y., Gunaratne, G. H.,**  
602 **Pletcher, S. and Roman, G.** (2012). Open-field arena boundary is a primary object of  
603 exploration for *Drosophila*. *Brain Behav.* **2**, 97–108.
- 604 **Strekalova, T., Spanagel, R., Bartsch, D., Henn, F. A. and Gass, P.** (2004). Stress-induced  
605 anhedonia in mice is associated with deficits in forced swimming and exploration.  
606 *Neuropsychopharmacology* **29**, 2007–2017.
- 607 **Van Praag, H. M.** (2004). Can stress cause depression? *Prog. Neuro-Psychopharmacology*  
608 *Biol. Psychiatry* **28**, 891–907.
- 609 **Willig, F., Palacios, A., Monmaur, P., M’Harzi, M., Laurent, J. and Delacour, J.** (1987).

610 Short-term memory, exploration and locomotor activity in aged rats. *Neurobiol. Aging* **8**,  
611 393–402.

612 **Willner, P.** (1997). Validity, reliability and utility of the chronic mild stress model of  
613 depression: a 10-year review and evaluation. *Psychopharmacology (Berl)*. **134**, 319–  
614 329.

615 **Willner, P.** (2017). The chronic mild stress (CMS) model of depression: History, evaluation  
616 and usage. *Neurobiol. Stress* **6**, 78–93.

617 **Willner, P., Towell, A., Sampson, D., Sophokleous, S. and Muscat, R.** (1987). Reduction  
618 of sucrose preference by chronic unpredictable mild stress, and its restoration by a  
619 tricyclic antidepressant. *Psychopharmacology (Berl)*. **93**, 358–364.

620 **Willner, P., Muscat, R. and Papp, M.** (1992). Chronic mild stress-induced anhedonia: A  
621 realistic animal model of depression. *Neurosci. Biobehav. Rev.* **16**, 525–534.

622 **Wittchen, H. U., Zhao, S., Kessler, R. C. and Eaton, W. W.** (1994). DSM-III-R  
623 generalized anxiety disorder in the National Comorbidity Survey. *Arch. Gen. Psychiatry*  
624 **51**, 355–364.

625 **Wong, M.-L. and Licinio, J.** (2001). Research and treatment approaches to depression. *Nat.*  
626 *Rev. Neurosci.* **2**, 343–351.

627 **Wong, M.-L. and Licinio, J.** (2004). From monoamines to genomic targets: a paradigm shift  
628 for drug discovery in depression. *Nat. Rev. Drug Discov.* **3**, 136–151.

629 **World Health Organisation** (2017). *Depression and Other Common Mental Disorders:*  
630 *Global Health Estimates.* Geneva.

631 **Zar, J. H.** (1999). *Biostatistical analysis.* Pearson Education India.

632 **Zwaan, B. J., Bijlsma, R. and Hoekstra, R. F.** (1991). On the developmental theory of  
633 ageing. I. Starvation resistance and longevity in *Drosophila melanogaster* in relation to  
634 pre-adult breeding conditions. *Heredity (Edinb)*. **66**, 29–39.

635

636 **SUPPLEMENTARY FIGURES AND INFORMATION**

637 **No Changes in Innate Responses Due to Stress**

638 Compared to their controls, neither male (Fig. S1A) nor female (Fig. S1B) flies subjected to  
639 mechanical perturbation showed any significant change in their propensity of negative  
640 geotaxis measured in the 1<sup>st</sup> trial of the RING assay. Similar results were obtained for males  
641 (Fig. S1C) and females (Fig. S1D) subjected to adult crowding.

642 Similarly, neither males (Fig. S2A) nor females (Fig. S2B) showed a change in the average  
643 distance travelled during negative geotaxis after mechanical perturbation. These trends were  
644 also retained when male (Fig. S2C) and female (Fig. S2D) flies were subjected to adult  
645 crowding.

646 When measured after 10 trials, no change in propensity of negative geotaxis was observed  
647 across both sexes after mechanical perturbation (Figs S3A & S3B) or after adult crowding  
648 (Figs S3C & S3D).

649 No changes were observed in the average distance travelled by males or females after  
650 mechanical perturbation (Figs S4A & S4B) and after crowding (Figs S4C & S4D).

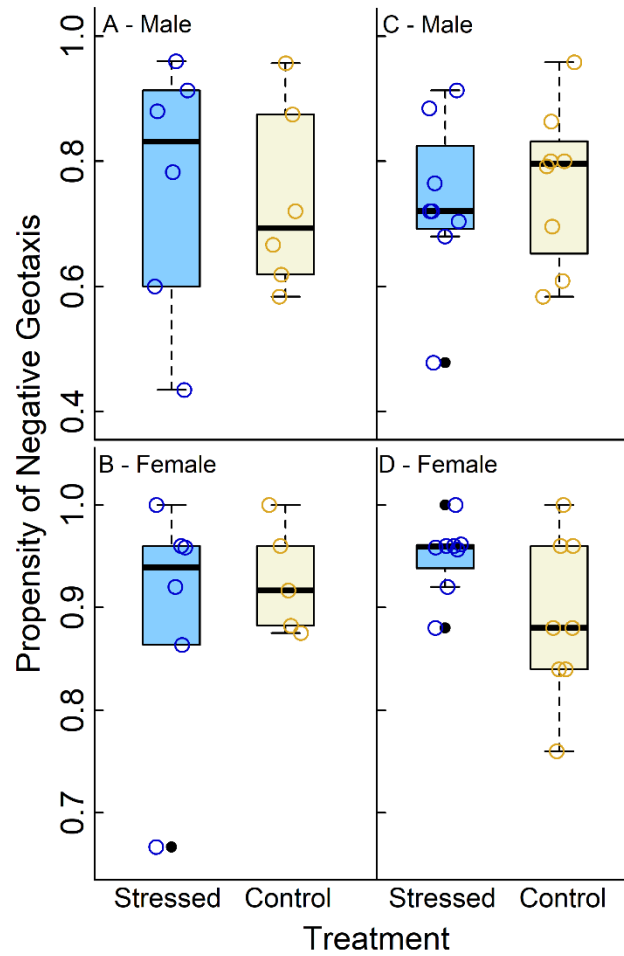

**Fig. S1. No effect of stress on negative geotactic propensity:** Propensity of negative geotaxis after the 1st trial in A. males and B. females after mechanical perturbation; C. males and D. females after adult crowding vs their respective controls

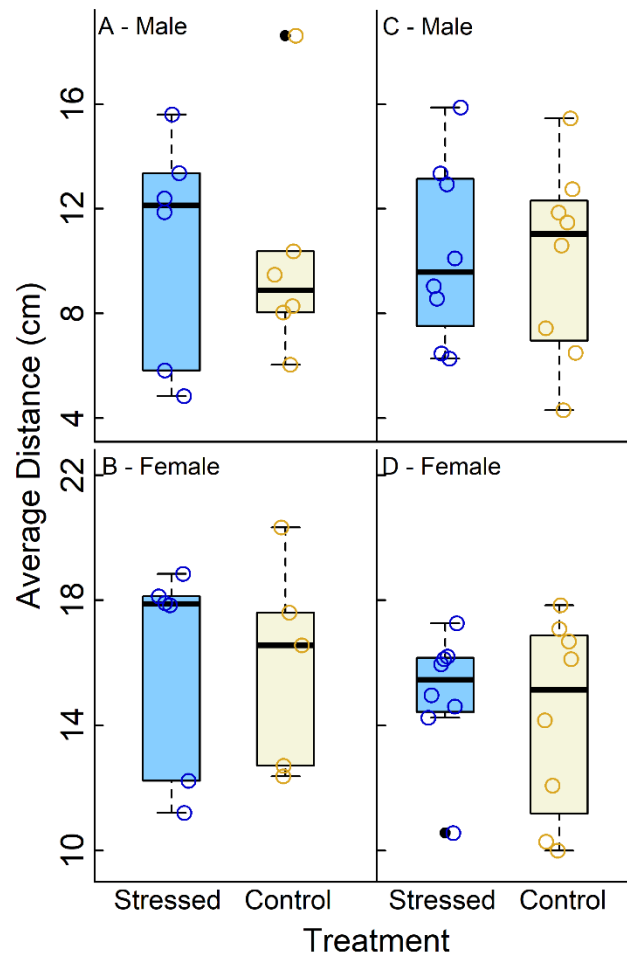

**Fig. S2: No effect of stress on negative geotactic distance travelled:** Average distance travelled after the 1st trial in A. males and B. females after mechanical perturbation; C. males and D. females after adult crowding vs their respective controls

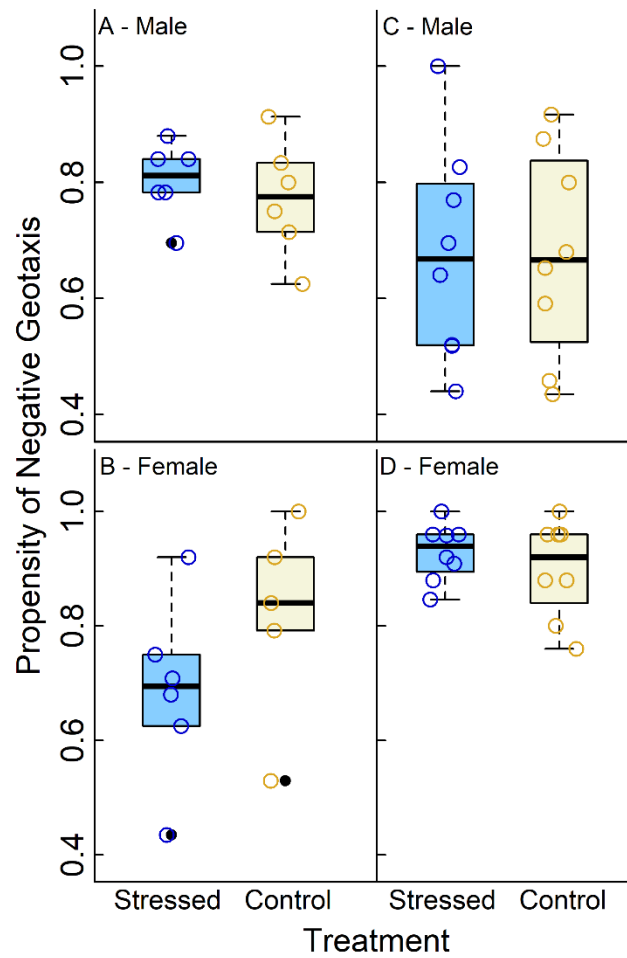

**Fig. S3. No changes in negative geotactic propensity after several trials:** Propensity of negative geotaxis after 10 trials in A. males and B. females after mechanical perturbation; C. males and D. females after adult crowding vs their respective controls

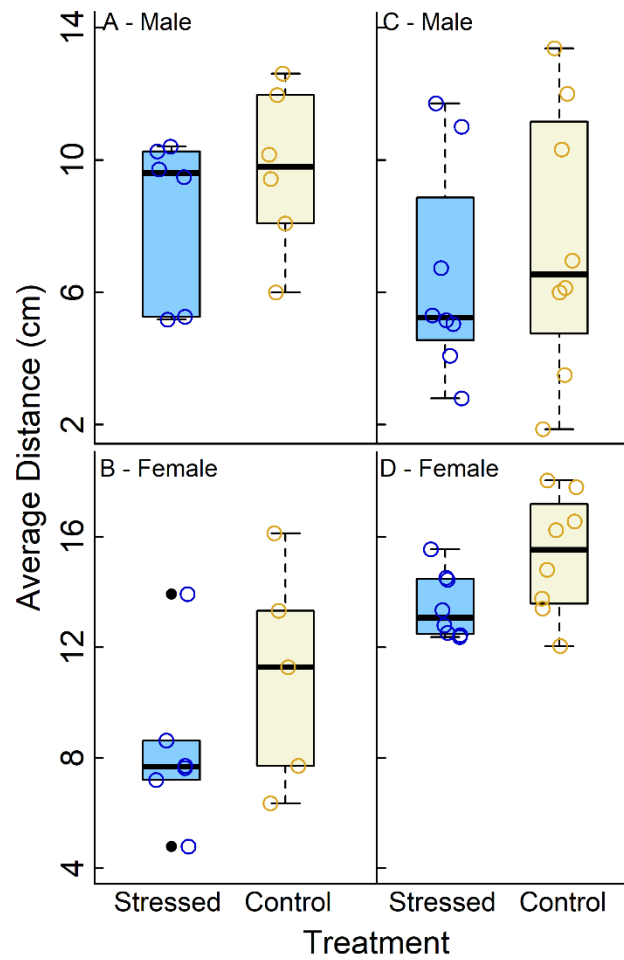

**Fig. S4. No changes in negative geotactic distance after several trials:** Average distance travelled after 10 trials in A. males and B. females after mechanical perturbation; C. males and D. females after adult crowding vs their respective controls

654

655

656



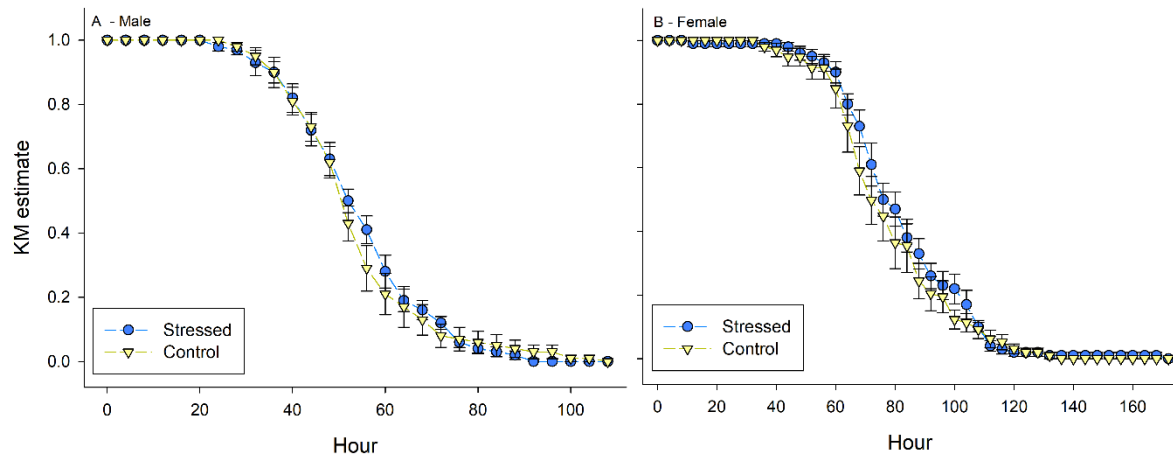

**Fig. S5. No change in starvation resistance after adult crowding:** Survivorship curve under starvation conditions based on KM estimates for A. males and B. females after adult crowding compared to their respective controls.

657 **Table S1. p-values, test statistics, Cohen's *d* and sample sizes for the RING and**  
 658 **starvation resistance assays comparing stressed versus control flies**

| Assay                                           | Sex | p-value |       | Test statistic |                | Cohen's <i>d</i> |              | Sample size (n)      |                        |
|-------------------------------------------------|-----|---------|-------|----------------|----------------|------------------|--------------|----------------------|------------------------|
|                                                 |     | M.P.    | A.C.  | M.P.           | A.C.           | M.P.             | A.C.         | M.P.                 | A.C.                   |
| <b>RING Propensity (Trial 1)</b>                | M   | 0.512   | 0.663 | F(1,2) = 0.62  | F(1,2) = 0.23  | 0.140<br>(L)     | 0.227<br>(L) | 6<br>(S)<br>6<br>(C) | 8<br>(S)<br>8<br>(C)   |
|                                                 | F   | 0.670   | 0.335 | F(1,2) = 0.24  | F(1,2) = 2.96  | 0.343<br>(L)     | 0.970<br>(H) | 6<br>(S)<br>5<br>(C) | 8<br>(S)<br>8<br>(C)   |
| <b>RING Average Distance (Trial 1)</b>          | M   | 0.637   | 0.893 | F(1,2) = 0.30  | F(1,2) = 0.02  | 0.117<br>(L)     | 0.079<br>(L) | 6<br>(S)<br>6<br>(C) | 8<br>(S)<br>8<br>(C)   |
|                                                 | F   | 0.924   | 0.386 | F(1,2) = 0.01  | F(1,2) = 2.08  | 0.033<br>(L)     | 0.268<br>(L) | 6<br>(S)<br>5<br>(C) | 8<br>(S)<br>8<br>(C)   |
| <b>RING Propensity (Trial 10)</b>               | M   | 0.302   | 0.577 | F(1,2) = 1.90  | F(1,2) = 0.39  | 0.367<br>(L)     | 0.001<br>(L) | 6<br>(S)<br>6<br>(C) | 8<br>(S)<br>8<br>(C)   |
|                                                 | F   | 0.123   | 0.203 | F(1,2) = 6.68  | F(1,2) = 9.18  | 0.768<br>(Me)    | 0.417<br>(L) | 6<br>(S)<br>5<br>(C) | 8<br>(S)<br>8<br>(C)   |
| <b>RING Average Distance (Trial 10)</b>         | M   | 0.165   | 0.204 | F(1,2) = 4.61  | F(1,2) = 2.62  | 0.537<br>(Me)    | 0.285<br>(L) | 6<br>(S)<br>6<br>(C) | 8<br>(S)<br>8<br>(C)   |
|                                                 | F   | 0.194   | 0.192 | F(1,2) = 3.72  | F(1,2) = 10.34 | 0.745<br>(Me)    | 1.045<br>(H) | 6<br>(S)<br>5<br>(C) | 8<br>(S)<br>8<br>(C)   |
| <b>Starvation Resistance-50% mortality time</b> | M   | -----   | 0.88  | -----          | U = 47.5       | -----            | 0.118<br>(L) | -----                | 10<br>(S)<br>10<br>(C) |
|                                                 | F   | -----   | 0.59  | -----          | U = 42.5       | -----            | 0.265<br>(L) | -----                | 10<br>(S)<br>10<br>(C) |

For p-value: #:  $0.05 < p < 0.1$ , \*:  $p < 0.05$ ; for Cohen's *d*: L:  $d < 0.5$  (low), Me:  $0.5 < d < 0.8$  (medium), H:  $d > 0.8$  (high); M: Male, F: Female; M.P: Mechanical Perturbation, A.C.: Adult Crowding, S: Stressed; C: Control

659
